# Supplementary material
Source: ML conference proceedings conference paper supplement (https://openreview.net/forum?id=leS8668NJm)
Supplement: supplementary_material [file attachment]

---

## Appendix for Toward Re-Identifying Any Animal

---

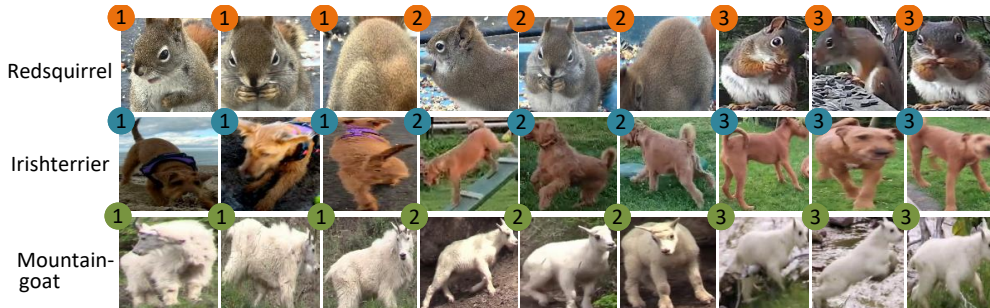

Figure 1: Cases of our Wildlife-71. Images in adjacent three columns belonging to the same identities. We can find that our Wildlife-71 has diverse object categories, various backgrounds, and numerous identities.

### 1 Wildlife-71 Dataset

In this section, we give details about our Wildlife-71 datasets, including the data collection, dataset partition, comparison with other datasets, and future works.

#### 1.1 Data Collection

Our Wildlife-71 dataset is mainly collected from three sources, namely integrating existing datasets [8, 7, 3], extracting target bounding boxes from a large-scale tracking dataset GOT-10k [1], and crawling web videos to extract target bounding boxes using a tracking algorithm [10]. Specifically, we incorporate four existing animal ReID datasets as test data into our Wildlife-71 dataset, namely zebra [8], seal [7], giraffe [8], and tiger [3]. Additionally, we gather data from the GOT-10k tracking dataset, which includes over 10k different categories of objects, each category equipped with multiple tracking videos and trajectory annotations for each individual within the videos. In this step, we choose wildlife categories and extract their bounding boxes from videos using the provided annotations. Each trajectory obtained during this process is treated as an individual. We then remove categories with fewer than 10 individuals, leaving us with 1,016 training identities from 67 different wildlife categories. This step requires roughly **40 man-hours**. To further augment the training data for these 67 categories, we collect data from the Internet. Using category class labels like “lion” and “redsquirrel” as keywords, we first crawl web videos from YouTube. Then, we manually filter the obtained videos based on the following criteria: 1) high resolution (greater than  $1280 \times 720$ ), 2) significant viewpoint variation, and 3) diverse backgrounds. This stage consumes approximately **150 man-hours**, obtaining 816 videos across the 67 wildlife categories. Using the acquired videos, we then employ a tracking algorithm [10] to extract individual trajectories. However, due to the imperfect of the tracking algorithm and factors such as camera shake, some trajectories are unsuitable. We tackle this problem by manually selecting trajectories with a sufficient number of bounding boxes (over 10) and removing inaccurate bounding boxes. After refining the data, we obtain 908 trajectories, each treated as an individual. This final step requires approximately **200 man-hours**. Examples from our Wildlife-71 dataset are presented in Figure 1.

#### 1.2 Dataset Partition

The Wildlife-71 dataset is divided into a training set and a test set. The training set contains 108,096 images from 1,924 identities spanning 67 distinct wildlife categories. To further supplement the training data, we integrated training data from a person ReID benchmark MSMT17 [9] and a vehicle

Table 1: Statistics of Wildlife-71 dataset.

| Set      | Benchmark       | #Category | #Identity | #Images |
|----------|-----------------|-----------|-----------|---------|
| Training | Wildlife (ours) | 67        | 1,924     | 108,096 |
|          | VehicleID [5]   | 1         | 13,164    | 113,346 |
|          | MSMT17 [9]      | 1         | 4,101     | 124,068 |
| Test     | Zebra [8]       | 1         | 546       | 2,958   |
|          | Seal [7]        | 1         | 57        | 2,080   |
|          | Giraffe [8]     | 1         | 109       | 597     |
|          | Tiger [3]       | 1         | 107       | 1887    |

Table 2: Comparison with other datasets. ‘‘Cams’’ indicates cameras; ‘‘Locs’’ denotes locations; ‘‘Sur.’’ means captured under surveillance cameras; ‘‘Web.’’ represents collected from webset.

| Datasets           | Object   | #Category | Scenario | #Cams/Locs | #Identity | #Images | Average Images |
|--------------------|----------|-----------|----------|------------|-----------|---------|----------------|
| Market-1501 [11]   | Person   | 1         | Sur.     | 6          | 1,501     | 32,668  | 22             |
| DukeMTMC-reID [12] | Person   | 1         | Sur.     | 8          | 1,812     | 34,183  | 19             |
| CUHK03 [4]         | Person   | 1         | Sur.     | 10         | 1,467     | 14,097  | 10             |
| MSMT17 [9]         | Person   | 1         | Sur.     | 15         | 4,101     | 124,068 | 31             |
| VeRi [6]           | Vehicle  | 1         | Sur.     | 20         | 776       | 49,357  | 64             |
| VehicleID [5]      | Vehicle  | 1         | Sur.     | --         | 26,267    | 221,763 | 8              |
| AiFV [2]           | Wildlife | 5         | Web.     | 5          | 93        | 20,490  | 220            |
| Wildlife-71        | Wildlife | 71        | Web.     | 1,832      | 2,743     | 115,618 | 42             |

31 ReID benchmark VehicleID [5] into the training set of Wildlife-71 as two additional object categories.  
 32 The test set of Wildlife-71 comprises four existing wildlife datasets: zebra [8], seal [7], giraffe [8],  
 33 and tiger [3]. Detailed statistics for our Wildlife-71 dataset are provided in Table 1. Particularly, the  
 34 original division of the tiger dataset [3] offers only one gallery image per identity. This setup does  
 35 not align with practical application scenarios, and the limited test set size could lead to large error  
 36 margins. Consequently, we modified the tiger dataset by integrating its training data into the gallery  
 37 set.

### 38 1.3 Comparison with other datasets

39 In Table 2, we compare our Wildlife-71 dataset with existing re-identification datasets across several  
 40 dimensions, including object type, number of categories, scenario, number of capturing locations,  
 41 number of identities, the total number of images, and the average number of images per identity.  
 42 Specifically, we have not incorporated our Wildlife-71 with MSMT17 [9] and VehicleID [5], in  
 43 this comparison. From this comparison, we observe that in terms of the number of identities, our  
 44 dataset surpasses most existing benchmarks, with the exception of VehicleID [5] and MSMT17 [9].  
 45 Additionally, each identity in our Wildlife-71 dataset contains over 42 images on average, surpassing  
 46 those of VehicleID (8 images per identity) and MSMT17 (31 images per identity). Moreover, as  
 47 our Wildlife-71 dataset was compiled from web videos, it boasts a significantly larger number  
 48 of capturing locations than other datasets, which are gathered through fixed surveillance cameras.  
 49 Besides, compared with the existing animal dataset AiFV [2], our Wildlife-71 contains significantly  
 50 more categories, identities, and images. Particularly, considering the limited identities and images,  
 51 the AiFV is constructed only for the evaluation purpose rather than training a category-generalizable  
 52 wildlife re-identification model. For other existing wildlife datasets like Zebra [8], Seal [7], Giraffe [8],  
 53 and Tiger [3], we have included them into our testing set, the information of which is given in Table 1.

### 54 1.4 Future work and extension version.

55 Esteemed peer reviewers provided valuable recommendations to enlarge the dataset, thereby am-  
 56 plifying its practical value. Taking this in mind, we keep continually expanding our Wildlife-71  
 57 dataset. As of now, the wildlife categories have grown to 106, and the count of wildlife identities in  
 58 the training set has been expanded about 10 times (about 19000). Moving forward, we will polish  
 59 the collected data while continuing its expansion. The extended version will be released soon, and  
 60 we remain committed to continually refining and expanding our Wildlife-71 dataset in subsequent  
 61 research endeavors.

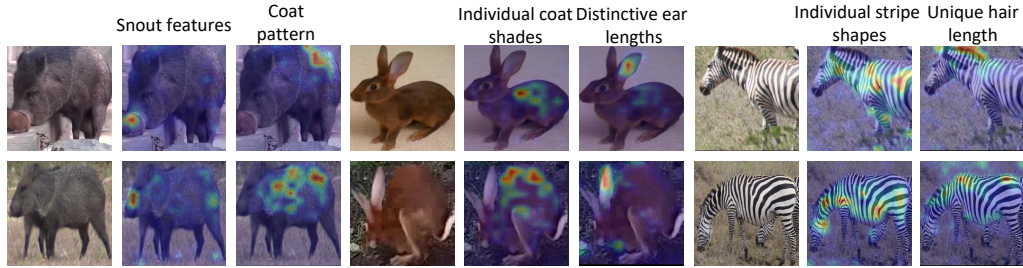

Figure 2: Visualization of activation maps generated by our text-guided attentive module. The first row is the employed textual guidance and the next two rows are corresponding activation maps. We can find that our text-guided attentive module could indeed make good use of the textual guidance and help our model focus on discriminative clues of target categories.

## References

- 62
- 63 [1] Lianghai Huang, Xin Zhao, and Kaiqi Huang. Got-10k: A large high-diversity benchmark for  
64 generic object tracking in the wild. *IEEE Trans. Pattern Anal. Mach. Intell.*, 43(5):1562–1577,  
65 2019.
- 66 [2] Ludmila I Kuncheva, Francis Williams, Samuel L Hennessey, and Juan J Rodríguez. A  
67 benchmark database for animal re-identification and tracking. In *2022 IEEE 5th International  
68 Conference on Image Processing Applications and Systems (IPAS)*, pages 1–6. IEEE, 2022.
- 69 [3] Shuyuan Li, Jianguo Li, Hanlin Tang, Rui Qian, and Weiyao Lin. Atrw: a benchmark for amur  
70 tiger re-identification in the wild. *arXiv preprint arXiv:1906.05586*, 2019.
- 71 [4] Wei Li, Rui Zhao, Tong Xiao, and Xiaogang Wang. Deepreid: Deep filter pairing neural network  
72 for person re-identification. In *Proc. IEEE Conf. Comp. Vis. Patt. Recogn.*, pages 152–159,  
73 2014.
- 74 [5] Hongye Liu, Yonghong Tian, Yaowei Yang, Lu Pang, and Tiejun Huang. Deep relative distance  
75 learning: Tell the difference between similar vehicles. In *Proc. IEEE Conf. Comp. Vis. Patt.  
76 Recogn.*, pages 2167–2175, 2016.
- 77 [6] Xinchen Liu, Wu Liu, Huadong Ma, and Huiyuan Fu. Large-scale vehicle re-identification in  
78 urban surveillance videos. In *Proc. IEEE Int. Conf. Multimedia Expo*, pages 1–6, 2016.
- 79 [7] Ekaterina Nepovinnikh, Tuomas Eerola, Vincent Biard, Piia Mutka, Marja Niemi, Mervi  
80 Kunnasranta, and Heikki Kälviäinen. Sealid: Saimaa ringed seal re-identification dataset.  
81 *Sensors*, 22(19):7602, 2022.
- 82 [8] Jason Parham, Jonathan Crall, Charles Stewart, Tanya Berger-Wolf, and Daniel I Rubenstein.  
83 Animal population censusing at scale with citizen science and photographic identification. In  
84 *AAAI Spring Symposium-Technical Report*, 2017.
- 85 [9] Longhui Wei, Shiliang Zhang, Wen Gao, and Qi Tian. Person transfer GAN to bridge domain  
86 gap for person re-identification. In *Proc. IEEE Conf. Comp. Vis. Patt. Recogn.*, pages 79–88,  
87 2018.
- 88 [10] Yifu Zhang, Peize Sun, Yi Jiang, Dongdong Yu, Fucheng Weng, Zehuan Yuan, Ping Luo, Wenyu  
89 Liu, and Xinggang Wang. Bytetrack: Multi-object tracking by associating every detection box.  
90 In *Proc. Eur. Conf. Comp. Vis.*, pages 1–21, 2022.
- 91 [11] Liang Zheng, Liyue Shen, Lu Tian, Shengjin Wang, Jingdong Wang, and Qi Tian. Scalable  
92 person re-identification: A benchmark. In *Proc. IEEE Int. Conf. Comp. Vis.*, pages 1116–1124,  
93 2015.
- 94 [12] Zhedong Zheng, Liang Zheng, and Yi Yang. Unlabeled samples generated by gan improve the  
95 person re-identification baseline in vitro. In *Proc. IEEE Int. Conf. Comp. Vis.*, pages 3754–3762,  
96 2017.
